# Supplementary material for: CRISPR-Cas and Restriction-Modification Act Additively against Conjugative Antibiotic Resistance Plasmid Transfer in Enterococcus faecalis
Source: PubMed Central journal article supplement (PMC4894674; doi:10.1128/msphere.00064-16), 2016-06-01

A)

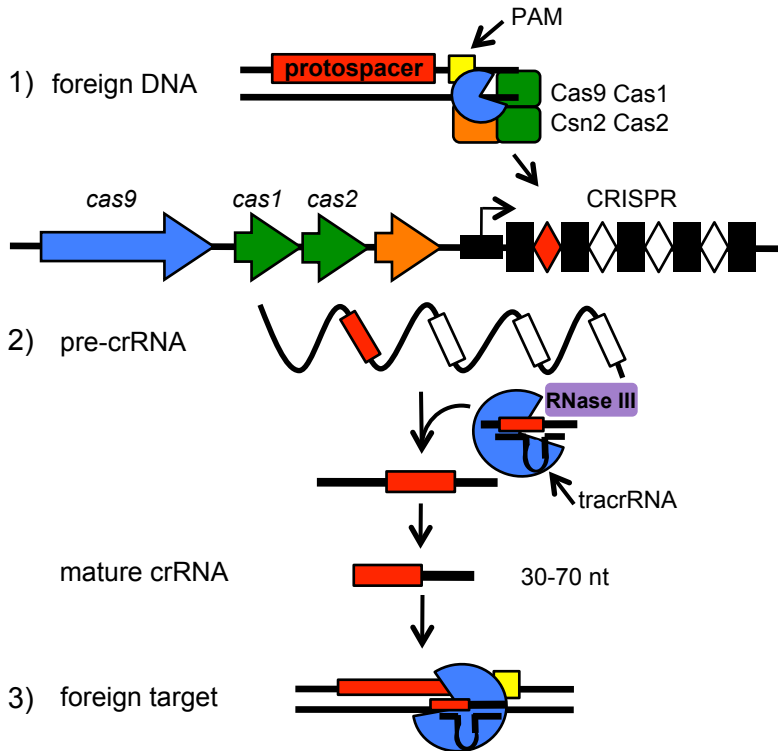

B)

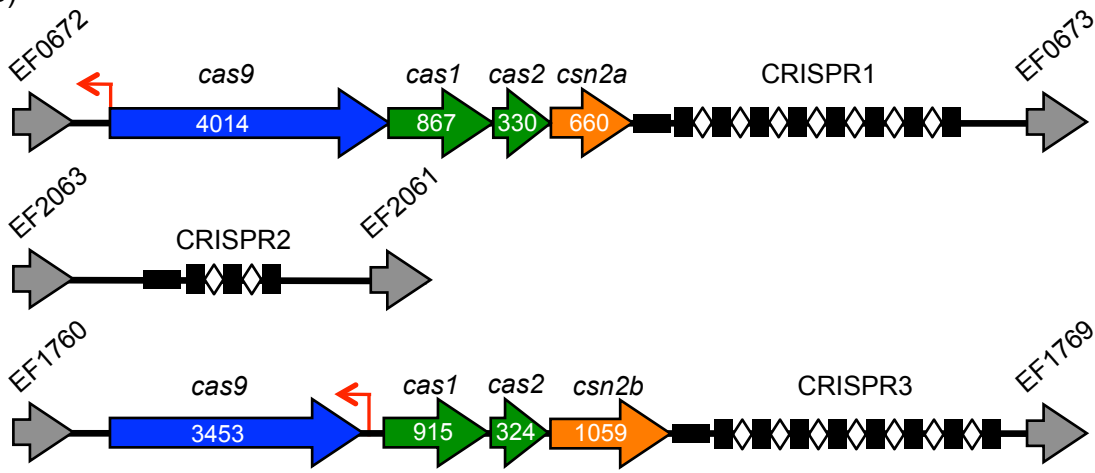

Supplement: sph003162100sf4.pdf [file sph003162100sf4.pdf]
