# Supplementary material for: CRISPR-Cas and Restriction-Modification Act Additively against Conjugative Antibiotic Resistance Plasmid Transfer in Enterococcus faecalis
Source: PubMed Central journal article supplement (PMC4894674; doi:10.1128/msphere.00064-16), 2016-06-01

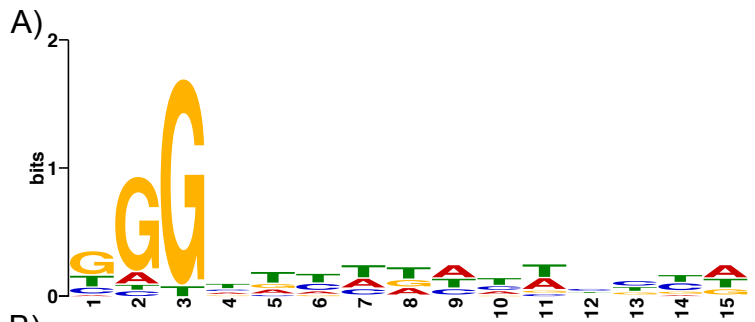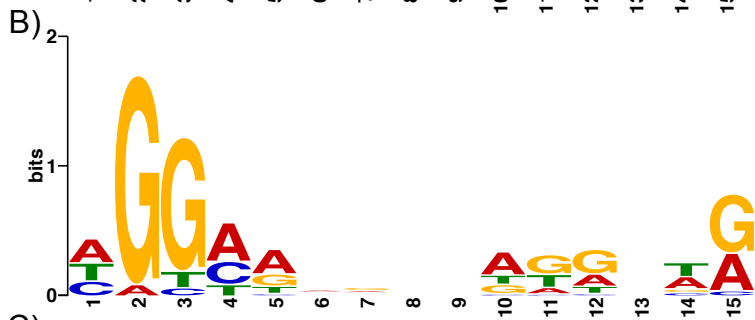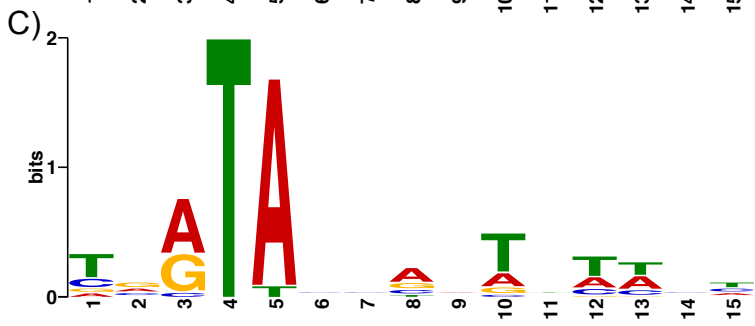

Supplement: sph003162100sf5.pdf [file sph003162100sf5.pdf]
