# Supplementary material for: CRISPR-Cas and Restriction-Modification Act Additively against Conjugative Antibiotic Resistance Plasmid Transfer in Enterococcus faecalis
Source: PubMed Central journal article supplement (PMC4894674; doi:10.1128/msphere.00064-16), 2016-06-01
Supplement: sph003162100sf6.pdf [file sph003162100sf6.pdf]

SpCas9 1 MDKKYSIGLDIGITNSVGVAVITDDYKVPSPKFKVLGNTDRHSIKKNLI GALLFDSG - - ET 58  
 SaCas9 1 MKRNYILGLDIGITSVGYGII - - DYET - - - - - RDVID - - - A GVRLFKEANVEN 43  
 EFCR3Cas9 1 - - - MYSIGLDDLGISVGVSVI - - DERT - - - - - GNVID - - - L GVRLFSAKNSSEK 40  
 M . YSIGLDIGI . SVGW . VI - - DY . T - - - - - R VID - - - . GVRLF . N E

SpCas9 59 AEATRLKRTARRRYTTRKRNRI CYLQEIFSNEMAKVDDSFHRL EESFLVEEDKKHERHPI 118  
 SaCas9 44 NEGRRSKRGARRLKRKRHRRIQRVKKLL - - - - - FDYNLLTDHSELSGINP - 88  
 EFCR3Cas9 41 NLERRTNRGGRRLLIRRKTNRLKDAKKIL - - - - - AAVGFFYEDKS - LKNSCP - 84  
 NE . RR . KRGARRL RRR . NRI . KKIL - - - - - . FL D . S L . P -

SpCas9 119 FGNIVDEVAYHEKYPTIYHLRKKLV DSTDKADLRLIY LALAHMIKFRGHFLIEGD LNP DN 178  
 SaCas9 89 - - - - - YEARKV - - GLSQKLSEEFSAALLHLAKRRGV - - - - HNVNEVE 125  
 EFCR3Cas9 85 - - - - - YQLRVK - - GLTEPLSKGEIYKVTLHLK KRG I - - - - SYLDEDD 121  
 - - - - - Y LRVK - - GLT . KLS EIY . ALLH . . K . RG . - - - - LNED .

SpCas9 179 SDVDKLFIQLVQTYNQLFEENPINA SGVD AKA ILSARLSKSRRL ENL IAQLPGEKKNGLF 238  
 SaCas9 126 EDT - - - - - GNE - LSTKEQISRNSKALEEKYVAE - - - - - 152  
 EFCR3Cas9 122 TEA - - - - - AKESQDYKEQVRENAQLLTKYT PGQ - - - - - 149  
 . D . - - - - - -AKE LS KEQ . SRN . . L PGE - - - - -

SpCas9 239 GNLIALSGLTPNFKSNFDLAEDAKLQLSKD TYDDDLDNLLAQIGDQYADLFLAAKNLSD 298  
 SaCas9 153 - - - - - LQLERLKKDGEV RGS INR - - - - - FKTSDYVKE 179  
 EFCR3Cas9 150 - - - - - IQLQRLKENNRVKTGINAQGN YQLNVFKV SAYANE 184  
 - - - - - LQL RLK D . V . . IN G . . FK . S Y . E

SpCas9 299 AILLSDILRVNTEITKAPLSASMIKRYDEHHQDLTLLKALVRQQLPEKYKEIFFDQSKNG 358  
 SaCas9 180 - - - AKQLLKVQ - - - - - KAY - - HQLDQSFIDTYID - - - - - 203  
 EFCR3Cas9 185 - - - LATILKTQ - - - - - QAFYPNELTDDWIALFVQPGIAE 215  
 - - - L ILKVQ - - - - - -KA . . QL . . I . . F . D

SpCas9 359 YAGYIDGGASQEEFYKFIKPILEKMDGTEELLVKNREDLLLRKQRTFDNGSIPHQIHLGE 418  
 SaCas9 204 - - - - - - - - - - - LLETTR - - - - - 209  
 EFCR3Cas9 216 EAG - - - - - LIYRKR - - - - - 224  
 AG - - - - - LL . . R - - - - -

SpCas9 419 LHAILRRQEDFYPPFLKDNREKIEKILTFRI PYYVGPLARGNSRFWMTRKSEETITPWN - 477  
 SaCas9 210 - - - - - TYYEGP - - - - - GEG - - - SPFG - 222  
 EFCR3Cas9 225 - - - - - PYYHGP - - - - - GNEANNSPYGR 241  
 - - - - - PYY GP - - - - - G E SP . G -

SpCas9 478 FEEVVDK GASAQSFI ERMTNFDKNLPNEKVL PKHSLLYEYFTVY NELTKVKYVTEGMRKP 537  
 SaCas9 223 WKDIKE - - - - - WY EMLMGHCTY FPEELRSVKYAYNADLYNALNDLNNLVITRDENEKL 275  
 EFCR3Cas9 242 WSDFKKTGQPATNIFDKLIG - - KDFQGELRASGLSLSAQQYNLLNDLTNLKIDG E I P L S P 299  
 W D . K . G A . . E . L G K FP ELR . K SL A . YN . LNDLTNLKI E . KP

SpCas9 538 AFLSGEQKKAIVDL LFKTNRKVTVKQLKEDYFKKIECFDSVEISGVEDRFNASLGTYHDL 597  
 SaCas9 276 EY - - - YEK FQ I I ENVFKQKKPTLQKIAKEILVNEEDIKGYRVTSTGKPEFTNLKVYHDI 332  
 EFCR3Cas9 300 E - - - QKEYILAELMTKEFTFRFGVNDVV KLLGVKKERLSGWRDLKKGKPEIHTLKG YRNW 355  
 E . - - - K . . I . EL . FK . K TVKQ . . K . . VK E . G . R . . GKPE . LK . YHD .

SpCas9 598 LKIIKDKDFLDNEENEDILEDIVLTLTFEDREMIEE - - - - - RLKTYAHLFDDKVMKQ 650  
 SaCas9 333 KDITARKEI I - - - ENAELLDQIAKILT IYQSSEDIQE - - - - - ELTNLNSEL TQEEIEQ 382  
 EFCR3Cas9 356 RKIFAESGIDLAMLPTETIDCLAKILT LNTEREGIENTLAFELPELAESVKLLVLD RYKE 415  
 . KI A . K . I . EN E . LD IAKILT L . . RE IEE - - - - - EL . . LL . KQ

SpCas9 651 LKR - RRYTGWGRLSRKLINGIRDKQSGKTILDF LKS DGFANRNFMQLIHDDSLTFKEDIQ 709  
 SaCas9 383 ISNLKGYTGTHNLSLKA IN - - - - - LILDELWHTNDNQIAIFNRLKLV P - - K 426  
 EFCR3Cas9 416 LSQSVSTQAWHRFSLKTLH - - - - - LLIPELMNATSEQNTLLEQFQLKSDVR 461  
 LS . . YTGWHRLSLK . IN - - - - - L . . DEL N N Q . . . L LK D . .

SpCas9 710 KAQVSGQGDSLHEHIANLAGSPA I KKGILQTVKVDDELVKVMGRHKPENIV IEMARENQT 769  
 SaCas9 427 KVDLSQQKEIPTTLVDDFI LSPVVKRSFIQS I KVINA I KKYG - - LPNDI I IELAREKN - 483  
 EFCR3Cas9 462 K - RYSEYKKLPTKDVLTETIYNPTV NKT V SQA FKV IDAL LVKYGKEQIRYIT IEMPRDDN - 519  
 K . . S QK . . PT V . I . SP . VKK . . Q . . KV IDAL . KKYG . P I . IEMARE N -

SpCas9 770 TQKGQKNSRERMKRIEEGIKELGSSQILKEHPV ENTQLQ - - - - - NEKLYLYY LQNGR 820  
 SaCas9 484 SKDAQKM INEMQKRNRQ - TNERIEE IIRTTGKENAKYL - - - - - IEKIKLHDMQEGK 533  
 EFCR3Cas9 520 EED EKKRIKELHAKNSQRKNDSSQSYFMQKSGWSQEK FQTTIQKNRRFLAKLLYYEQDGI 579  
 . D . QK I . E KRN Q NE . S I . . G EN K . Q - - - - - . EKL LYY Q . G .

SpCas9 821 DMY - - - - VDQELDINRLSDYDV DHIIPQSFLK DDSIDNKVLTRSDKNRGKSDNVP - - - - 871  
 SaCas9 534 CLYSLEA IPLEDLLNPNFNYEVDHIIPRSV SFDNSFNKVLVKQEENS KKG NRTPFQYLS 593  
 EFCR3Cas9 580 CAYTGLSISP ELLVSDST - - EIDHIIPISISL DDSINNKVLVLSKANQVKGQQTPT YDAWM 637  
 C . Y . . I ELL . N . YEVDHIIP S . S DDSINNKVLV . S . N . KG . . TP .

SpCas9 872 - - - SEEVVKMKKNY - - WRQLLN AK - LITQRKFDNLTKA ERGGLSELDKAGFIKRQLVETR 925  
 SaCas9 594 SSDSKISYETFKKH - - ILNLAKGKGRISKTKKEYLLE - ERDINRFSVQKDFINRNLVDTR 650  
 EFCR3Cas9 638 DGSFKKINGKFSNWDDYQKWVESR - HFSHKKENLLE - TRNIFDSEQVEKFLARNLNDTR 695  
 SK . KFKN . - - . L . . K . . IS . . K . N LLE - ER I F I RNLVDTR

SpCas9 926 QITKHVAQILDSRMNTKYDENDKLIREVKVITLKS KLV SDFRKFDFQYK VREIN - NYHHA 984  
 SaCas9 651 YATRGLMNLRSYFRVNN - - - - - LDVKVKSINGGFTSFLRRKWKFKKERNKG - YK HHA 702  
 EFCR3Cas9 696 YASRLV LNTLQSFF - - AN - - - - - QETKVRV VNGSFTHTLRKKWGADLDKTRETHHHA 746  
 YATR . V . N . L S . F N - - - - - EVKV . . NG FTS LRKKW F K . R . . HHA

SpCas9 985 HDAYLNAV - - - VGTALIKKYPKLESEFVYGDYKVYDVRKMI - AKSEQEIGKATAKY - - - 1036  
 SaCas9 703 EDALI IANADFI - - - - FKEWKKLDKAKKVMENQMFE EKQ - - - AESMPEI - ETEQEY - KEI 753  
 EFCR3Cas9 747 VDATLCAVTPFVKVSRHYAVKEETGEKVMREIDFETGEIVDEM SYREF - KKS KKYERKT 805  
 DA L AV FV . K . KLE . . KVM . FE . . - A S EI - K . KY . .

SpCas9 1037 - - - - - FFYSNIMNFFKTEITLANGEIRKRPLIETNGETGEIVW DKG R DFA TVRKVL 1087  
 SaCas9 754 FITP - - - - HQIKHIKDFKDYKYSHRVDKKNRELINDTLYSTRKD - DKGNTL - - - - 800  
 EFCR3Cas9 806 YQVKWPNFREQLKPVNLHPRIKFSHQVDRKANRKLSDATIYSVREK - TEVKTLKSGKQKI 864  
 . - - - - Q . K I F . K . SH VD . K NR LI . T . YS . R - DKG . TL . . .

SpCas9 1088 SMPQVNI VKKTEVQTGGFSKESILPKRNSDKLIARKKDWDPKKYGGFDSPTVAYSVLVVA 1147  
 SaCas9 801 - - - - - IVNNLNGLYDKDNDKLLKLLINKSPEKLLM - - YHHD P QTYQKLKLIMEQYGD - - - 849  
 EFCR3Cas9 865 TTDEYTIGKIKDIYTV D G - - - WEA FKKKQDKLLM - - KD L DEKTYERLLSIAETTPDFQEV 919  
 . I . K . . . YT . D K L KK DKLLM - - KD DPKTY . L SI E Y D .

SpCas9 1148 KVEKG - - - - - KSKKLSVKELLGITIMERS SFEKN - - - - - PIDFLEAKGYKEVKKDLI IK 1197  
 SaCas9 850 - - - - - EKNPLYKY YEETG - NYLTKYSKKNNGPVIK KIKYYGNKLN AHL - - DITDD 896  
 EFCR3Cas9 920 EEKNGKVKRVKRS PFAVYCEENDIPAIRKYAKKNNGPLIRSLKY YDGKLNKHI - - NITKD 977  
 G - - - - K . PL Y EE GI . . KYSKKN GP . I . IKYY . . KLNKH . - - DIT D

SpCas9 1198 LPKYSLFELENGRKRMLASAGE - - - - - LQKGNELALPSKYVNFLYLASHYEK LK GSP 1249  
 SaCas9 897 YP - - - - - NSRNKVVKLSLKP YRF D VY - - LDNGVYK FVTVKNL DV IKKENY YEVNSKCY 947  
 EFCR3Cas9 978 SQGRPVEKTKNGRKVTLQSLKPYRYDIYQDLETKAYYTVQLYYS D LRFVEGKYGITEKEY 1037  
 P . NGRKV L . SLKPYR . D . Y - - L . G . Y V . KY . D . . . E . YE . K Y

SpCas9 1250 EDNEQKQLFV EQHK - - - - - HYLDEIIEQ - - - - - ISEFSKRVI LADANL DKV - - 1290  
 SaCas9 948 EEAKKLLKKSINQAE - - - - - FIASFYNNDLIKI - - - - - NGELYRVIGV NNDLLNR IEV 994  
 EFCR3Cas9 1038 - - - - - MKKVAEQTKGQVVRFCFSLQKNDGLEIEWKDSQRYDVR FYNFQSA NSINFKGLEQ 1092  
 E . KK . . EQ K - - - - - F S Y ND . IEI - - - - - . E FY . . . N . NL . . E

SpCas9 1291 - - LSAYNKHRDKPIREQAENI IHLFTLTNLGAP A - AFKYFDTTIDRKRYTSTK E V LDATL 1347  
 SaCas9 995 NMIDITYREYLENMNDKRPPRI - - - - - IKTIA SKTQS I KKYSTDILGNLYEVKSKKHPQII 1050  
 EFCR3Cas9 1093 EMMPAENQFKQKPYNNGA INLN - - - - - IAKY GKEGKLLRKFNTDILGK KHYLYY EK EPKNI 1148  
 M . A N . . KP N . A N . I - - - - - I . G . . KKF TDILGK . Y . EK P I

SpCas9 1348 IHQSITGLYETRIDLSQLGGD 1368  
 SaCas9 1051 KKG - - - - - 1053  
 EFCR3Cas9 1149 IK - - - - - 1150  
 IK - - - - -
