# Supplementary material for: CRISPR-Cas and Restriction-Modification Act Additively against Conjugative Antibiotic Resistance Plasmid Transfer in Enterococcus faecalis
Source: PubMed Central journal article supplement (PMC4894674; doi:10.1128/msphere.00064-16), 2016-06-01
Supplement: sph003162100sf7.pdf [file sph003162100sf7.pdf]

|                | 1 |   |   |   |   |   |   | 10 |   |   |   |   |   | 20 |   |   |   |   | 30 |   |   |   |   | 36 |   |   |   |   |   |   |   |   |   |   |   |
|----------------|---|---|---|---|---|---|---|----|---|---|---|---|---|----|---|---|---|---|----|---|---|---|---|----|---|---|---|---|---|---|---|---|---|---|---|
| <b>CRISPR1</b> | G | T | T | T | A | G | A | G  | T | C | A | T | G | T  | T | G | T | T | T  | A | G | A | A | T  | G | G | T | A | C | C | A | A | A | A | C |
| <b>CRISPR2</b> | G | T | T | T | A | G | A | G  | T | C | A | T | G | T  | T | G | T | T | T  | A | G | A | A | T  | G | G | T | A | C | C | A | A | A | A | C |
| <b>CRISPR3</b> | G | T | T | T | A | C | T | G  | A | T | A | A | G | A  | A | A | T | T | A  | T | T | G | A | G  | A | G | T | A | C | A | A | A | A | A | C |
