# Supplementary material for: CRISPR-Cas and Restriction-Modification Act Additively against Conjugative Antibiotic Resistance Plasmid Transfer in Enterococcus faecalis
Source: PubMed Central journal article supplement (PMC4894674; doi:10.1128/msphere.00064-16), 2016-06-01

Complementary oligos containing **T11CR2S1**, **PAM** and pCF10 *uvrB* sequence were annealed:

pVP501 GGATCCGATTTTGAACCTTTGGAAACAAAAGACGCTAAACTTCCGCATAGGTATCTTTTCTTACCTTGGGGTGCAGTAGGAATTGCTTTTGGTGGATCC  
CCTAGGCATAAACTTGAACCTTGTCTGCGATTTGAAGGCTATCCATAGAAAAGAATGGTACCACACGTATCCTTTAACGAAAAAACGACCTAGG

Annealed oligos were ligated into pGEM T-Easy:

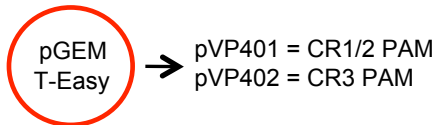

pVP401 and pVP402 were used as templates to change restriction site for generation of pLT06 constructs:

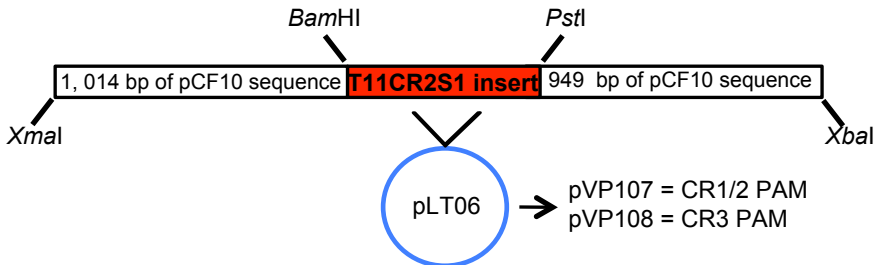

pVP107 and pVP108 were electroporated into competent OG1SSp pCF10 cells and subjected to temperature shift and counter-selection to incorporate the new sequence into pCF10:

pVP501 AACTTCCGCATAGGTATCTTTTCTTACCTTGG  
pVP502 AACTTCCGCATAGGTATCTTTTCTTACCTTGTGA

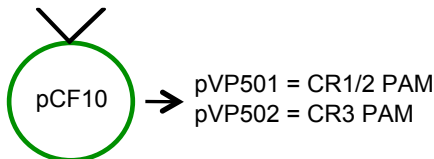

Supplement: sph003162100sf8.pdf [file sph003162100sf8.pdf]
